# Supplementary material for: The Distribution of Pseudodiaptomus marinus in European and Neighbouring Waters—A Rolling Review
Source: MDPI journal article supplement (doi:10.3390/jmse11061238), 2023-06-16
Supplement: s1 [file s1]

## Supplementary Materials

**This Supplementary Materials lists the bibliographic references used in the preparation of Figure 1. The references [A1-A34] are ranked in alphabetical order.**

- A1. Albaina, A.; Uriarte, I.; Aguirre, M.; Abad, D.; Iriarte, A.; Villate, F.; Estonba, A. Insights on the origin of invasive copepods colonizing Basque estuaries; a DNA barcoding approach. *Mar. Biodivers. Rec.* **2016**, *9*, 51. <https://doi.org/10.1186/s41200-016-0045-2>.
- A2. Besiktepe, S.; Terbiyik Kurt, T.; Gubanov, A. Mesozooplankton composition and distribution in İzmir Bay, Aegean Sea: With special emphasis on copepods. *Reg. Stud. Mar. Sci.* **2022**, *55*, 102567. <https://doi.org/10.1016/j.rsma.2022.102567>.
- A3. Brylinski, J.M.; Antajan, E.; Raud, T.; Vincent, D. First record of the Asian copepod *Pseudodiaptomus marinus* Sato, 1913 (Copepoda: Calanoida: Pseudodiaptomidae) in the southern bight of the North Sea along the coast of France. *Aquat. Invasions* **2012**, *7*, 577–584.
- A4. Delpy, F.; Pagano, M.; Blanchot, J.; Carlotti, F.; Thibault-Botha, D. Man-induced hydrological changes, metazooplankton communities and invasive species in the Berre Lagoon (Mediterranean Sea, France). *Mar. Poll. Bull.* **2012**, *64*, 1921–1932.
- A5. Deschutter, Y.; Vergara, G.; Mortelmans, J.; Deneudt, K.; De Schampheleere, K.; De Troch, M. Distribution of the invasive calanoid copepod *Pseudodiaptomus marinus* (Sato, 1913) in the Belgian part of the North Sea. *BioInvasions Rec.* **2018**, *7*, 33–41. <https://doi.org/10.3391/bir.2018.7.1.05>.
- A6. de Olazabal, A.; Tirelli, V. First record of the egg-carrying calanoid copepod *Pseudodiaptomus marinus* in the Adriatic Sea. *Mar. Biodivers. Rec.* **2011**, *4*, e85. <https://doi.org/10.1017/S1755267211000935>.
- A7. Di Capua, I.; Piredda, R.; Mazzocchi, M.G.; Zingone, A. Metazoan diversity and seasonality through eDNA metabarcoding at a Mediterranean long-term ecological research site. *ICES J. Mar. Sci.* **2021**, *78*, 3303–3316. <https://doi.org/10.1093/icesjms/fsab059>.
- A8. Erdoğan, Ö.; Ertan, Ö.O. Abundance and diversity of zooplankton in the Köprüçay estuary, Turkey. *J. Aquac. Eng. Fish. Res.* **2014**, *1*, 19–32. <https://doi.org/10.3153/JAEFR15002>.
- A9. Fiori, E.; Benzi, M.; Ferrari, C.R.; Mazziotti, C. Zooplankton community structure before and after *Mnemiopsis leidyi* arrival. *J. Plankton Res.* **2019**, *41*, 803–820. <https://doi.org/10.1093/plankt/fbz060>.
- A10. Garbazey, O.A.; Popova, E.V.; Gubanov, A.D.; Altukov, D.A. First record of the occurrence of *Pseudodiaptomus marinus* (Copepoda: Calanoida: Pseudodiaptomidae) in the Black Sea (Sevastopol Bay). *Mar. Biol. J.* **2016**, *1*, 78–80. <https://doi.org/10.21072/mbj.2016.01.4.11>.
- A11. Günther, B.; Kneibelsberger, T.; Neumann, H.; Laakmann, S.; Martinez Arbizu, P. Metabarcoding of marine environmental DNA based on mitochondrial and nuclear genes. *Sci. Rep.* **2018**, *8*, 14822. <https://doi.org/10.1038/s41598-018-32917-x>.
- A12. Guy-Haim, T.; Velasquez, X.; Terbiyik-Kurt, T.; Di Capua, I.; Mazzocchi, M.G.; Morov, A.R. A new record of the rapidly spreading calanoid copepod *Pseudodiaptomus*

- 
- marinus* (Sato, 1913) in the Levantine Sea using multi-marker metabarcoding. *BioInvasions Rec.* **2022**, *11*, 964–976. <https://doi.org/10.3391/bir.2022.11.4.14>.
- A13. Horn, H.G.; van Rijswijk, P.; Soetaert, K.; van Oevelen, D. Drivers of spatial and temporal micro- and mesozooplankton dynamics in an estuary under strong anthropogenic influences (the Eastern Scheldt, Netherlands). *J. Sea Res.* **2023**, *192*, 102357. <https://doi.org/10.1016/j.seares.2023.102357>.
- A14. Jha, U.; Jetter, A.; Lindley, J.A.; Postel, L.; Wootton, M. Extension and distribution of *Pseudodiaptomus marinus*, an introduced copepod, in the North Sea. *Mar. Biodivers. Rec.* **2013**, *6*, e53.
- A15. Karuza, A.; Caroppo, C.; Monti, M.; Camatti, E.; Di Poi, E.; Stabili, L.; Auriemma, R.; Pansera, M.; Cibic, T.; Del Negro, P. 'End to end' planktonic trophic web and its implications for the mussel farms in the Mar Piccolo of Taranto (Ionian Sea, Italy). *Environ. Sci. Poll. Res.* **2016**, *23*, 12707–12724. <https://doi.org/10.1007/s11356-015-5621-1>.
- A16. Kourkoutmani, P.; Michaloudi, E. First record of the calanoid copepod *Pseudodiaptomus marinus* Sato, 1913 in the North Aegean Sea, in Thessaloniki Bay, Greece. *BioInvasions Rec.* **2022**, *11*, 738–746. <https://doi.org/10.3391/bir.2022.11.3.15>.
- A17. Lin, Y.; Vidjak, O.; Ezgeta-Balić, D.; Bojanić Varezić, D.; Šegvić-Bubić, T.; Stagličić, N.; Zhan, A.; Briski, E. Plankton diversity in Anthropocene: Shipping vs. aquaculture along the eastern Adriatic coast assessed through DNA metabarcoding. *Sci. Total Environ.* **2022**, *807*, 151043.
- A18. Lučić, D.; Mozetič, P.; Francé, J.; Lučić, P.; Lipej, L. Additional record of the non-indigenous copepod *Pseudodiaptomus marinus* (Sato, 1913) in the Adriatic Sea. *Acta Adriat.* **2015**, *56*, 275–282.
- A19. Lučić, D.; Onofri, I.; Garić, R.; Viočić, I.; Vranješ, M.; Gangai Zovko, B.; Jurinović, J.; Njire, J.; Hure, M. Ingression of the hydromedusa *Neotima lucullana* (Delle Chiaje, 1822) into the ecosystem of the Neretva river estuary (south-eastern Adriatic, Croatia). *Acta Adriat.* **2022**, *63*, 165–174.
- A20. Margiotta, F.; Balestra, C.; Buondonno, A.; Casotti, R.; D'Ambra, I.; Di Capua, I.; Gallia, R.; Mazzocchi, M.G.; Merquioli, L.; Pepi, M.; et al. Do plankton reflect the environmental quality status? The case of a post-industrial Mediterranean Bay. *Mar. Environ. Res.* **2020**, *160*, 104980. <https://doi.org/10.1016/j.marenvres.2020.104980>.
- A21. Pansera, M.; Granata, A.; Guglielmo, L.; Minutoli, R.; Zagami, G.; Brugnano, C. How mesh-size selection reshape the description of zooplankton community structure in coastal lakes? *Estuar. Coast. Shelf Sci.* **2014**, *151*, 221–235.
- A22. Sabia, L.; Zagami, G.; Mazzocchi, M.G.; Zambianchi, E.; Uttieri, M. Spreading factors of a globally invading coastal copepod. *Medit. Mar. Sci.* **2015**, *16*, 460–471. <https://doi.org/10.12681/mms.1154>.
- A23. Reyes-Martínez, M.J.; González-Gordillo, J.G. New record of the non-indigenous copepod *Pseudodiaptomus marinus* Sato, 1913 (Calanoida, Pseudodiaptomidae) from the Guadalquivir Estuary (Gulf of Cádiz, SW Spain). *Crustaceana* **2019**, *92*, 675–683. <https://doi.org/10.1163/15685403-00003903>.

- 
- A24. Richirt, J.; Goberville, E.; Ruiz-Gonzalez, V.; Sautour, B. Local changes in copepod composition and diversity in two coastal systems of Western Europe. *Estuar. Coast. Shelf Sci.* **2019**, *227*, 106304. <https://doi.org/10.1016/j.ecss.2019.106304>.
- A25. Stefanni, S.; Stanković, D.; Borme, D.; de Olazabal, A.; Juretić, T.; Pallavicini, A.; Tirelli, V. Multi-marker metabarcoding approach to study mesozooplankton at basin scale. *Sci. Rep.* **2018**, *8*, 12085. <https://doi.org/10.1038/s41598-018-30157-7>.
- A26. Tiralongo, F.; Akyol, O.; Al Mabruk, S.A.A.; Battaglia, P.; Beton, D.; Bitls, B.; Borg, J.A.; Bouchouca, M.; Çinar, M.E.; Crocetta, F.; et al. New alien Mediterranean biodiversity records (August 2022). *Medit. Mar. Sci.* **2022**, *23*, 725–747. <https://doi.org/10.12681/mms.31228>.
- A27. Terbiyık Kurt, T.; Beşiktepe, Ş.; Velasquez, X.; Guy-Haim, T. *Recent Introduction of Non-Indigeneous Copepods Species Pseudodiaptomus Marinus in the İskenderun Bay (Northeastern Mediterranean)*; Department of Marine Biology, Faculty of Fisheries, Çukurova University: Adana, Turkey, *in preprint*.
- A28. Terbiyık Kurt, T.; Beşiktepe, S.; Velasquez, X.; Guy-Haim, T. *New Two Record of Pseudodiaptomus Marinus in the Yenifoça Bay (Aegean Sea)*; Department of Marine Biology, Faculty of Fisheries, Çukurova University: Adana, Turkey, *in preprint*.
- A29. Uriarte, I.; Villate, F.; Iriarte, A. Zooplankton recolonization of the inner estuary of Bilbao: Influence of pollution abatement, climate and non-indigenous species. *J. Plankton Res.* **2016**, *38*, 718–731. <https://doi.org/10.1093/plankt/fb060>.
- A30. Uttieri, M.; Aguzzi, L.; Aiese Cigliano, R.; Amato, A.; Bojanić, N.; Brunetta, M.; Camatti, E.; Carotenuto, Y.; Damjanović, T.; Delpy, F.; et al. WGEUROBUS—Working Group “Towards a EUROpean OBServatory of the non-indigenous calanoid copepod *Pseudodiaptomus marinus*”. *Biol. Invasions* **2020**, *22*, 885–906. <https://doi.org/10.1007/s10530-019-02174-8>.
- A31. Vidjak, O.; Bojanić, N.; de Olazabal, A.; Benzi, M.; Brautović, I.; Camatti, E.; Hure, M.; Lipej, L.; Lučić, D.; Pansera, M.; et al. Zooplankton in Adriatic port environments: Indigenous communities and non-indigenous species. *Mar. Poll. Bull.* **2019**, *147*, 133–149. <https://doi.org/10.1016/j.marpolbul.2018.06.055>.
- A32. Vidjak, O.; Damjanović, T.; Rožić, S.; Šegvić Bubić, T.; Bojanić, N.; Hrabar, J.; Arapov, J.; Skračić, M. Spreading of the non-indigenous Indo-Pacific copepod *Pseudodiaptomus marinus* Sato, 1913 in eastern Adriatic coastal and transitional waters. In *11th International Conference on Biological Invasions. The Human Role in Biological Invasions—A case of Dr Jekyll and Mr Hyde?* Jelaska, S.D., Ed.; Croatian Ecological Society: Zagreb, 2020; p. 95.
- A33. Wootton, M.; Fischer, A.C.; Ostle, C.; Skinner, J.; Stevens, D.P.; Johns, D.G. Using the Continuous Plankton Recorder to study the distribution and ecology of marine pelagic copepods. In *Trends in Copepod Studies—Distribution, Biology and Ecology*, Uttieri, M., Ed.; Nova Science Publishers, Inc.: New York, NY, USA, 2018; pp. 13–42.
- A34. Zagami, G.; Brugnano, C. Diel, seasonal and man-induced changes in copepod assemblages and diversity, with special emphasis on hyperbenthic calanoid species, in a Mediterranean meromictic system (Lake Faro). *Mar. Fresh. Res.* **2013**, *64*, 951–964.
